# Supplementary material for: Mental Well-Being, Depression, and Anxiety among Resident Physicians at a Tertiary University Teaching Hospital in Ethiopia: A Cross-Sectional Study
Source: Research Square preprint supplement (doi:10.21203/rs.3.rs-8143376/v1), 2025-12-22
Supplement: Supplementary file 1 [file ebb6549180e3e5df7e6b53ea.docx]

**Supplementary 1: Annex 1:**

**Table 1. Resident Distribution by Department**

| **Department** | **Total Residents** | **Selected (n)** |
| --- | --- | --- |
| Internal Medicine | 129 | 40 |
| Psychiatry | 26 | 9 |
| Obstetrics & Gynecology | 91 | 29 |
| Pediatrics & Child Health | 85 | 27 |
| Surgical Departments* | 196 | 62 |
| Emergency Medicine | 57 | 18 |
| Dermatology & Venereology | 28 | 9 |
| Neurology | 23 | 7 |
| Radiology | 48 | 15 |
| Oncology | 40 | 13 |
| ENT | 19 | 6 |
| Maxillofacial | 6 | 3 |
| Nuclear Medicine | 12 | 6 |
| Orthopedics | 54 | 17 |
| Pathology | 15 | 5 |
| Family Medicine | 20 | 6 |
| Ophthalmology | 28 | 9 |
| Anesthesiology | 75 | 24 |
| **Total** | 952 | 305 |

*Includes Plastic & Reconstructive Surgery, Neurosurgery, Urology, Pediatric Surgery, and General Surgery.

**Note:** Numbers provide context for the study population and were not used in formal sample size calculation.

**Supplementary 2: Annex 2:**

**Questionnaire**

Section 1: Socio-Demographic Characteristics

1.1 Age: __________

1.2 Sex: ☐ Male ☐ Female

1.3 Department: __________________________

1.4 Year of Residency Training:

  ☐ First year ☐ Second year ☐ Third year or above

1.5 Relationship Status:

  ☐ Single ☐ Have boyfriend/girlfriend ☐ Married ☐ Divorced ☐ Widowed

1.6 Ethnicity:

  ☐ Oromo ☐ Amhara ☐ Tigre ☐ Others: ________________

1.7 Religion:

  ☐ Orthodox ☐ Muslim ☐ Protestant ☐ Others: ________________

1.8 Monthly Income: _______________________

Section 2: Factors Associated With Resident Physician Mental Wellbeing

No. Question Response Options

2.1 Khat use ☐ Yes ☐ No

2.2 Alcohol use ☐ Yes ☐ No

2.3 Tobacco use ☐ Yes ☐ No

2.4 Current use of non-prescribed recreational drugs ☐ Yes ☐ No

2.5 Family history of mental illness ☐ Yes ☐ No

2.6 Religious commitment ☐ Not committed at all ☐ weakly committed ☐ Somehow committed ☐ Committed ☐ strongly committed

2.7 Sleep amount ☐ Not enough ☐ Somehow enough ☐ basically enough ☐ definitely enough ☐ More than enough

2.8 Working hours per week ☐ Up to 40 hrs ☐ 41–48 hrs ☐ 48–64 hrs ☐ More than 64 hrs

2.9 Family and social support ☐ Yes ☐ No

2.10 Main family provider ☐ Yes ☐ No

2.11 Ever experienced a major traumatic event? ☐ Yes ☐ No

2.12 Satisfied with specialty of choice? ☐ Yes ☐ No

2.13 Break during duty hour’s ☐ Yes ☐ No

2.14 Injustice in workplace ☐ Yes ☐ No

2.15 Workplace violence or abuse ☐ Yes ☐ No

2.16 Previous diagnosis of mental illness ☐ Yes ☐ No

2.17 Satisfied with academic support provided? ☐ Yes ☐ No

2.18 Ever considered discontinuing the program? ☐ Yes ☐ No

2.19 If Yes to 2.18, reason ☐ Academic environment unpleasant ☐ Family constraint ☐ financial ☐ others: __________

**Section 3: Patient Health Questionnaire-9 (PHQ-9)**

**Over the last 2 weeks, how often have you been bothered by the following problems?**
(✔ one response per row)

| **No.** | **Item** | **Not at all (0)** | **Several days (1)** | **More than half the days (2)** | **Nearly every day (3)** |
| --- | --- | --- | --- | --- | --- |
| 1 | Little interest or pleasure in doing things | ☐ | ☐ | ☐ | ☐ |
| 2 | Feeling down, depressed, or hopeless | ☐ | ☐ | ☐ | ☐ |
| 3 | Trouble falling or staying asleep, or sleeping too much | ☐ | ☐ | ☐ | ☐ |
| 4 | Feeling tired or having little energy | ☐ | ☐ | ☐ | ☐ |
| 5 | Poor appetite or overeating | ☐ | ☐ | ☐ | ☐ |
| 6 | Feeling bad about yourself or feeling like a failure | ☐ | ☐ | ☐ | ☐ |
| 7 | Trouble concentrating | ☐ | ☐ | ☐ | ☐ |
| 8 | Moving/speaking slowly or being fidgety/restless | ☐ | ☐ | ☐ | ☐ |
| 9 | Thoughts of being better off dead or self-harm | ☐ | ☐ | ☐ | ☐ |

**Section 4: Generalized Anxiety Disorder-7 (GAD-7)**

**Over the last 2 weeks, how often have you been bothered by the following problems?**

| **No.** | **Item** | **Not at all (0)** | **Several days (1)** | **Over half the days (2)** | **Nearly every day (3)** |
| --- | --- | --- | --- | --- | --- |
| 1 | Feeling nervous, anxious, or on edge | ☐ | ☐ | ☐ | ☐ |
| 2 | Not being able to stop or control worrying | ☐ | ☐ | ☐ | ☐ |
| 3 | Worrying too much about different things | ☐ | ☐ | ☐ | ☐ |
| 4 | Trouble relaxing | ☐ | ☐ | ☐ | ☐ |
| 5 | Being so restless that it's hard to sit still | ☐ | ☐ | ☐ | ☐ |
| 6 | Becoming easily annoyed or irritable | ☐ | ☐ | ☐ | ☐ |
| 7 | Feeling afraid as if something awful might happen | ☐ | ☐ | ☐ | ☐ |

**Total Score:** _______
